# Supplementary material
Source: publisher figshare collection journal article supplement (https://karger.figshare.com/ndownloader/files/28970604)
Supplement: Supplementary file 1 [file 28970604]

| Supplementary table 6. Adjusted effects of various factors on regional brain volumes of DMN areas from stepwise regression model after excluding extreme outliers and CIRS-G-SI=0. (n=145) | | | | | | | | | | | | | | |
| --- | --- | --- | --- | --- | --- | --- | --- | --- | --- | --- | --- | --- | --- | --- |
| DMN ROI | Model 1a | | | | | | | Model 2b | | | | | | |
| R^2 | Age | | HbA1c | | CIRS-G-TS | | R^2 | Age |  | HbA1c |  | CIRS-G-SI |  |
| β(SE) | p† | β(SE) | p† | β(SE) | p† | β(SE) | p† | β(SE) | p† | β(SE) | p† |
| Hippocampus (L) | 0.18 | **-29.53(5.64)** | **<0.001*** |  |  |  |  | 0.18 | **-29.53(5.64)** | **<0.001*** |  |  |  |  |
| Hippocampus (R) | 0.17 | **-30.12(5.91)** | **<0.001*** |  |  |  |  | 0.17 | **-30.12(5.91)** | **<0.001*** |  |  |  |  |
| Medial orbitofrontal (L) | 0.02 | -14.2(9.27) | 0.151 |  |  |  |  | 0.02 | -14.20(9.27) | 0.145 |  |  |  |  |
| Medial orbitofrontal (R) | 0.07 | **-23.64(8.04)** | **0.019*** |  |  |  |  | 0.07 | **-23.64(8.04)** | **0.019*** |  |  |  |  |
| Rostral anterior cingulate (L) | 0.06 | **-20.29(6.7)** | **0.019*** |  |  |  |  | 0.08 | **-18.43(6.72)** | **0.019*** |  |  | -169.67(89.49) | 0.099 |
| Rostral anterior cingulate (R) | 0.03 | -13.01(6.77) | 0.117 |  |  |  |  | 0.03 | -13.01(6.77) | 0.099 |  |  |  |  |
| Caudal anterior cingulate (L) | 0.04 | -11.42(6.24) | 0.125 |  |  | -12.37(7.28) | 0.137 | 0.02 | -11.75(6.27) | 0.099 |  |  |  |  |
| Caudal anterior cingulate (R) | 0.02 | -9.72(6.54) | 0.151 |  |  |  |  | 0.02 | -9.72(6.54) | 0.146 |  |  |  |  |
| Posterior cingulate (L) | 0.07 | -9.56(5.48) | 0.137 | 75.84(40.25) | 0.119 | **-16.18(6.63)** | **0.048*** | 0.02 | -8.84(5.55) | 0.144 |  |  |  |  |
| Posterior cingulate (R) | 0.05 | **-15.68(5.72)** | **0.023*** |  |  |  |  | 0.05 | **-15.68(5.72)** | **0.019*** |  |  |  |  |
| Isthmus (L) | 0.02 |  |  |  |  |  |  | 0.02 |  |  |  |  |  |  |
| Isthmus (R) | 0.10 | **-15.70(4.26)** | **0.003*** |  |  |  |  | 0.12 | **-15.29(4.27)** | **0.004*** | 58.86(31.22) | 0.099 | -111.80(59.25) | 0.099 |
| Precuneus (L) | 0.06 | **-35.67(12.24)** | **0.019*** |  |  |  |  | 0.06 | **-35.67(12.24)** | **0.019*** |  |  |  |  |
| Precuneus (R) | 0.08 | **-33.35(11.90)** | **0.022*** |  |  |  |  | 0.08 | **-33.35(11.90)** | **0.019*** |  |  |  |  |
| Supramarginal (L) | 0.03 | -47.35(24.14) | 0.116 |  |  |  |  | 0.03 | -47.35(24.14) | 0.099 |  |  |  |  |
| Supramarginal (R) | 0.10 | -36.75(16.28) | 0.063 |  |  | -42.37(18.79) | 0.063 | 0.10 | -35.79(16.07) | 0.069 |  |  | **-588.41(214.23)** | **0.019*** |
| Abbreviations: DMN, default mode network; ROI, region of interest; L, left hemisphere; R, right hemisphere; β, unstandardized regression coefficient; SE, standard error. a Stepwise regression model: Dependent variable: regional volume of each area in DMN. Covariates include age, gender, BMI, years of education, CIRS-G-TS, and HbA1c.  b Stepwise regression model: Dependent variable: regional volume of each area in DMN. Covariates include age, gender, BMI, years of education, CIRS-G-SI, and HbA1c.  † Adjusted p-value via Benjamini-Hochberg procedure. * p<.05 | | | | | | | | | | | | | | |
|  |
|  |
|  |
|  |
